# Supplementary material for: Caspase-8 Regulates Endoplasmic Reticulum Stress-Induced Necroptosis Independent of the Apoptosis Pathway in Auditory Cells
Source: PubMed Central journal article supplement (PMC6928907; doi:10.3390/ijms20235896), 2019-11-24

## **Supplementary Information**

### **Caspase-8 regulates endoplasmic reticulum stress-induced necroptosis independent of the apoptosis pathway in auditory cells**

Akihiro Kishino<sup>1\*</sup>, Ken Hayashi<sup>2</sup>, Miyoko Maeda<sup>1</sup>, Toyoharu Jike<sup>3</sup>, Chiaki Hidai<sup>4</sup>, Yasuyuki Nomura<sup>1</sup> and Takeshi Oshima<sup>1</sup>

<sup>1</sup> Department of Otolaryngology, School of Medicine, Nihon University, Tokyo 173-8610, Japan

<sup>2</sup> Department of Otolaryngology, Kamio Memorial Hospital, Tokyo 101-0063, Japan

<sup>3</sup> Research Institute of Medical Science, School of Medicine, Nihon University, Tokyo 173-8610, Japan

<sup>4</sup> Department of Physiology, School of Medicine, Nihon University, Tokyo 173-8610, Japan

\*Corresponding author: Dr. Akihiro Kishino, Department of Otolaryngology, School of Medicine, Nihon University, Postal address: 30-1, Oyaguchi Kami-cho, Itabashi-ku, Tokyo, Japan 173-8610, Phone: +81-3-3972-8111, Fax: +81-3-3972-1321, E-mail: [akkishino187@gmail.com](mailto:akkishino187@gmail.com)

### **Supplementary Figure S1a**

Representative transmission electron microscopy photomicrographs of low magnifying scales in HEI-OC1 cells treated with tunicamycin (50  $\mu\text{g/ml}$  for 24 h). Tunicamycin-treated cells showed morphological characteristics of apoptosis (arrow) or necroptosis (arrowhead) (left and middle panel: 2,000 $\times$ , and right panel: 2,500 $\times$  magnifications).

### **Supplementary Figures S1-6.**

Uncropped version of blots displayed in main figure 1f (Figures S1 b–f), 2c (Figures S2 a and b), 2f (Figures S2 c–e), 3b (Figures S3 a–d), 4a (Figures S4 a–d), 4d (Figures S4 e–i), 5a (Figures S5 a–c) and 5c (Figures S5 d–h).

### **Supplementary Figure S4j.**

Representative western blots showing the expressions of caspase-8 and MLKL in tunicamycin-treated caspase-8 KD cells (50  $\mu\text{g/ml}$  for 48 h).  $\beta$ -actin was included as the loading control. The expressions of caspase-8 and MLKL were detected, and the means  $\pm$  S.D. (fold changes compared to the control group) of three or more independent studies were presented.

# Supplementary Figure 1.

**a**

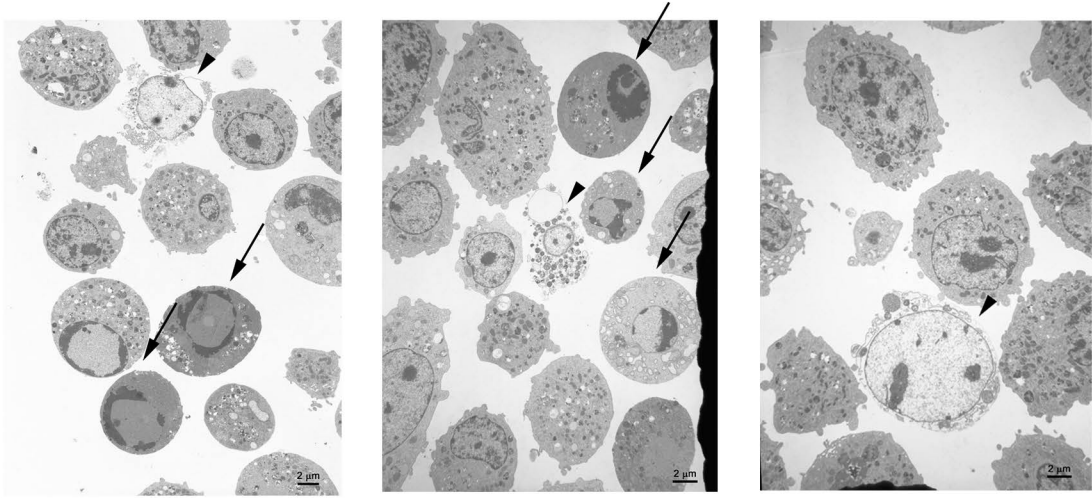

**b**

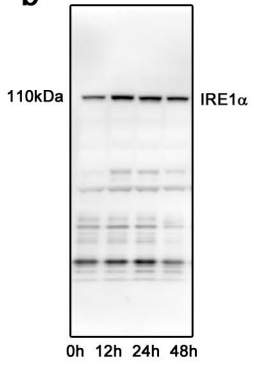

**c**

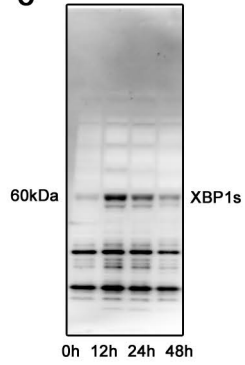

**d**

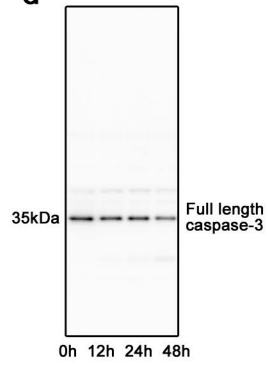

**e**

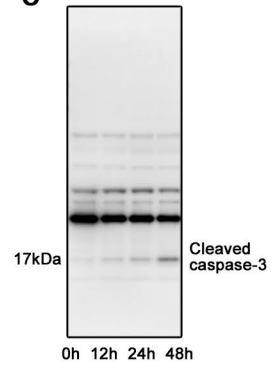

**f**

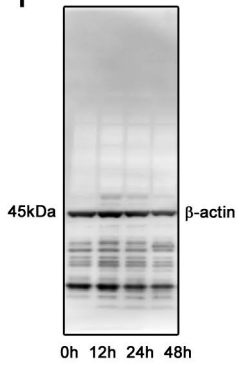

## Supplementary Figure 2.

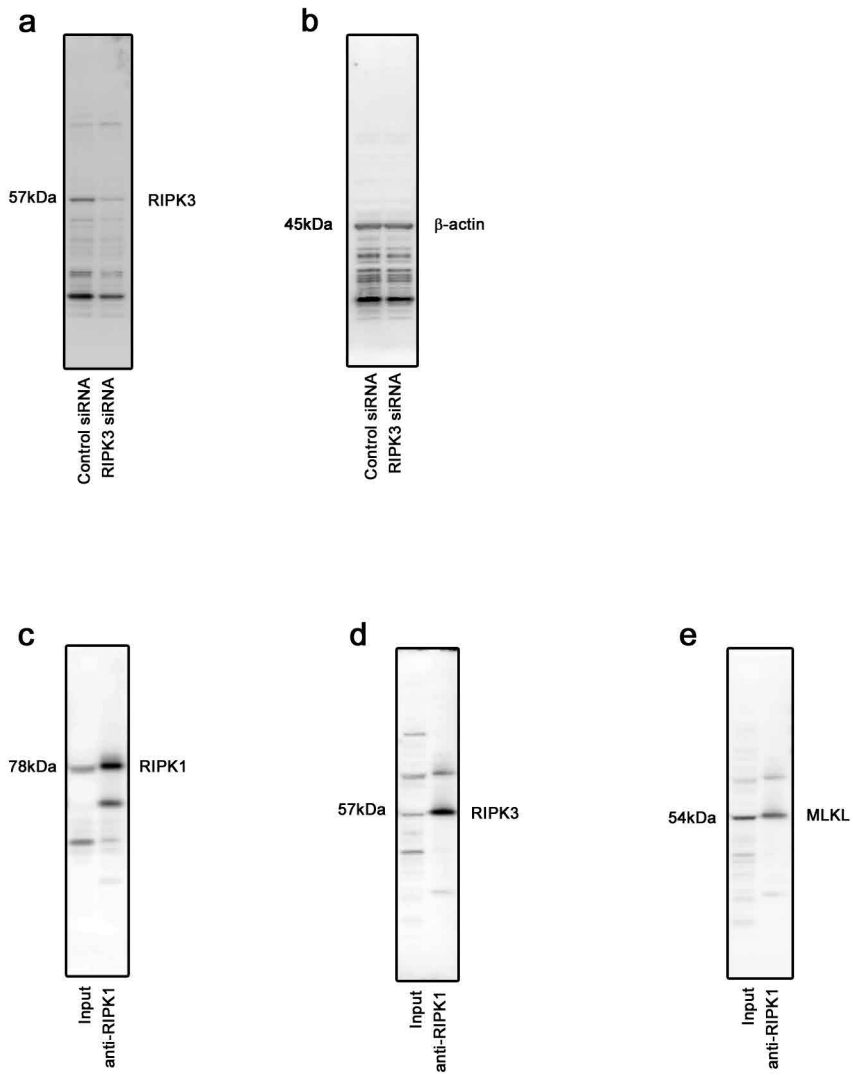

# Supplementary Figure 3.

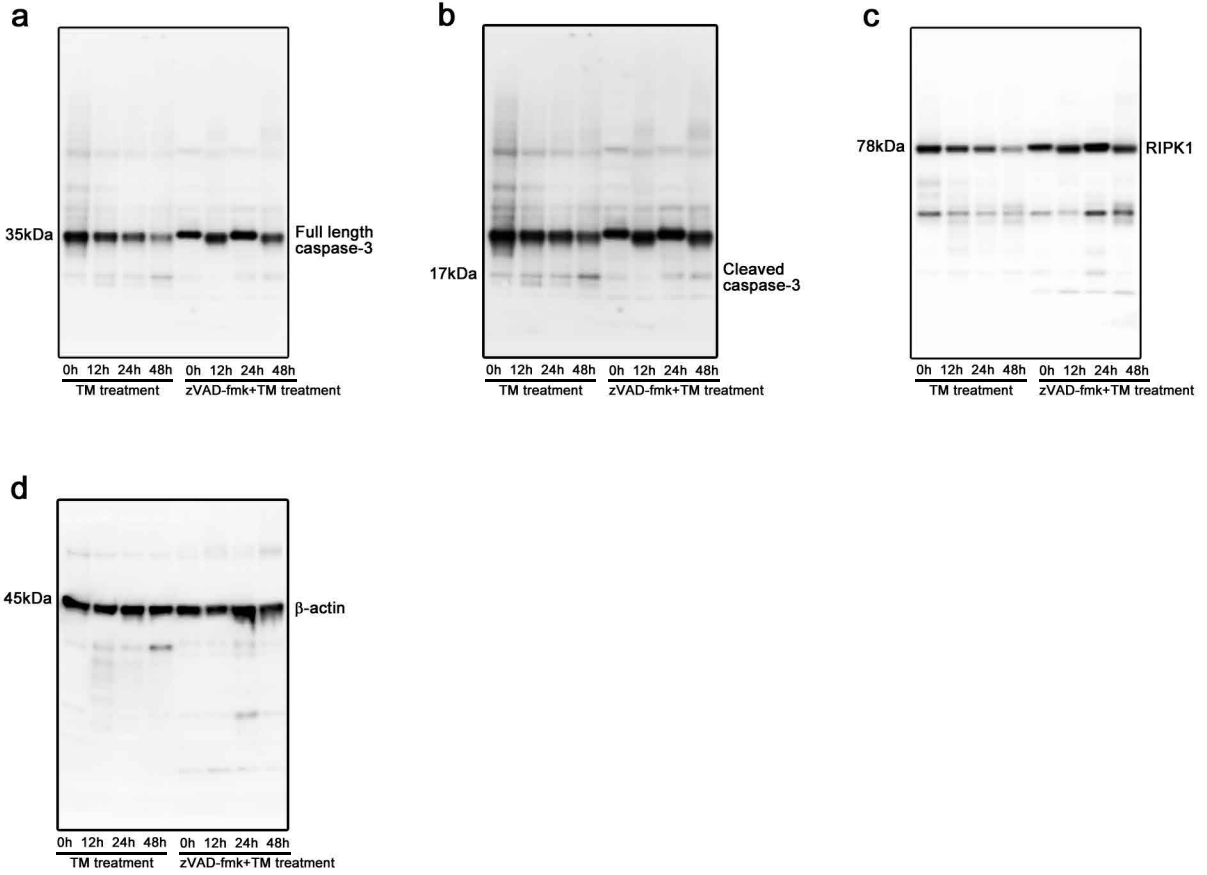

# Supplementary Figure 4.

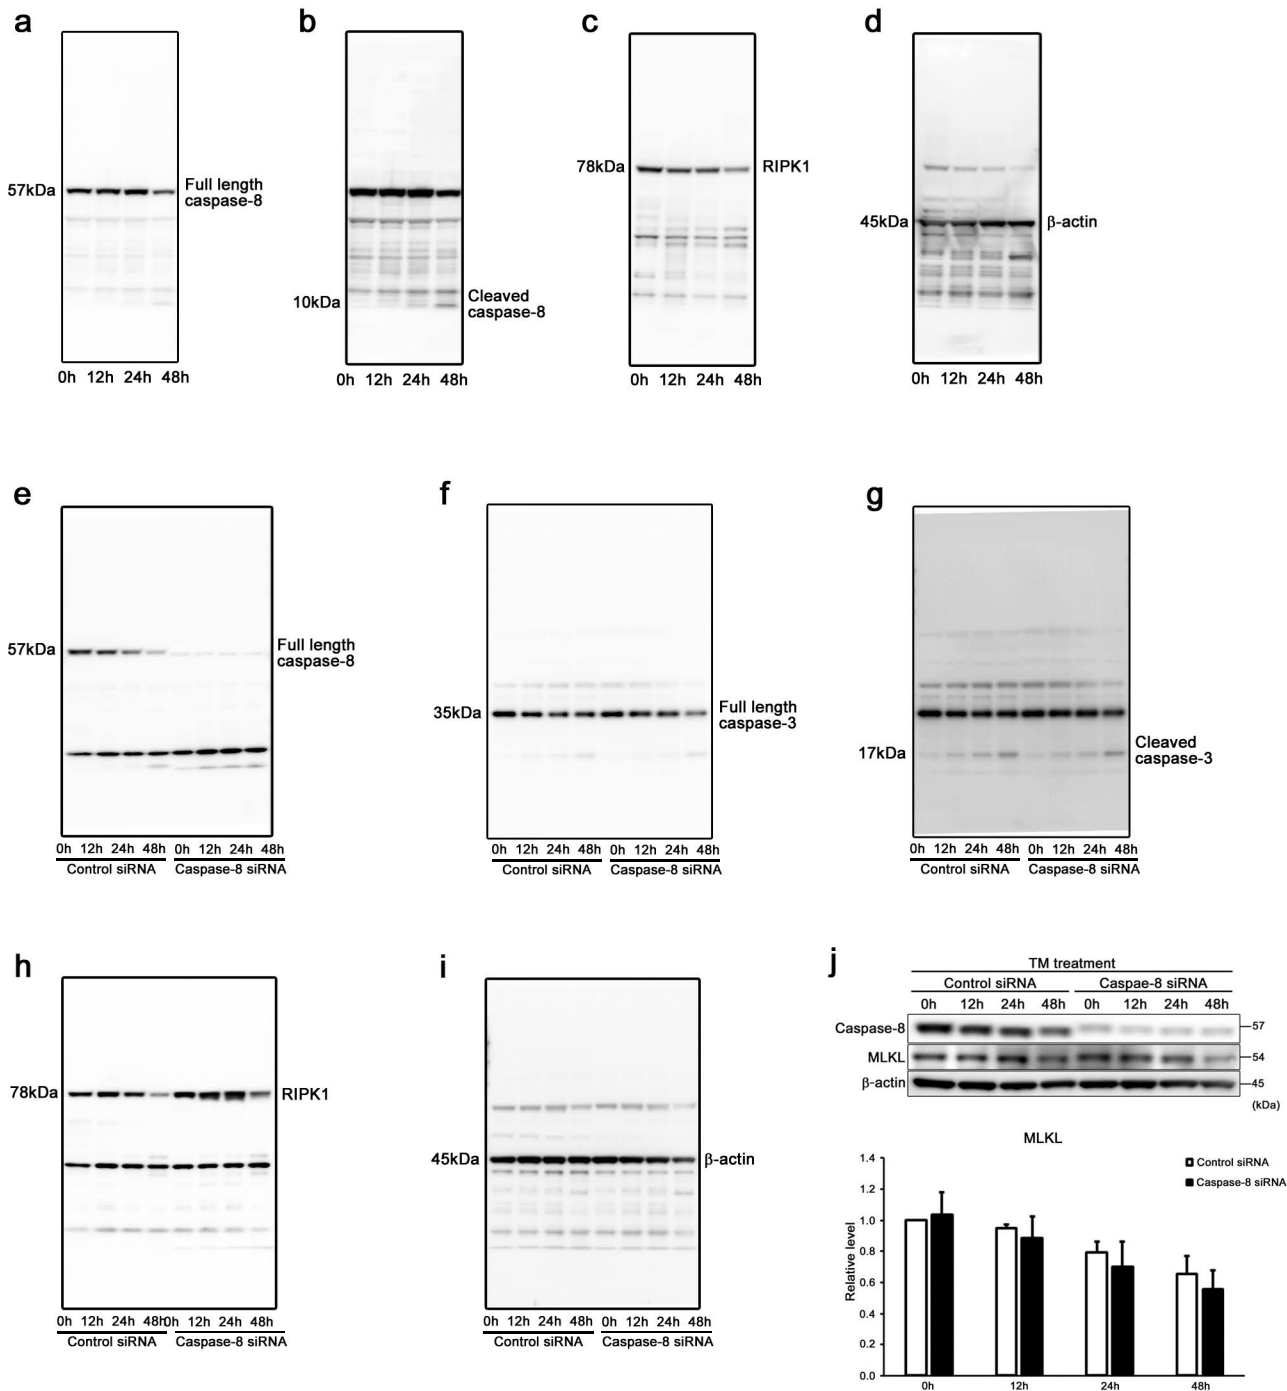

# Supplementary Figure 5.

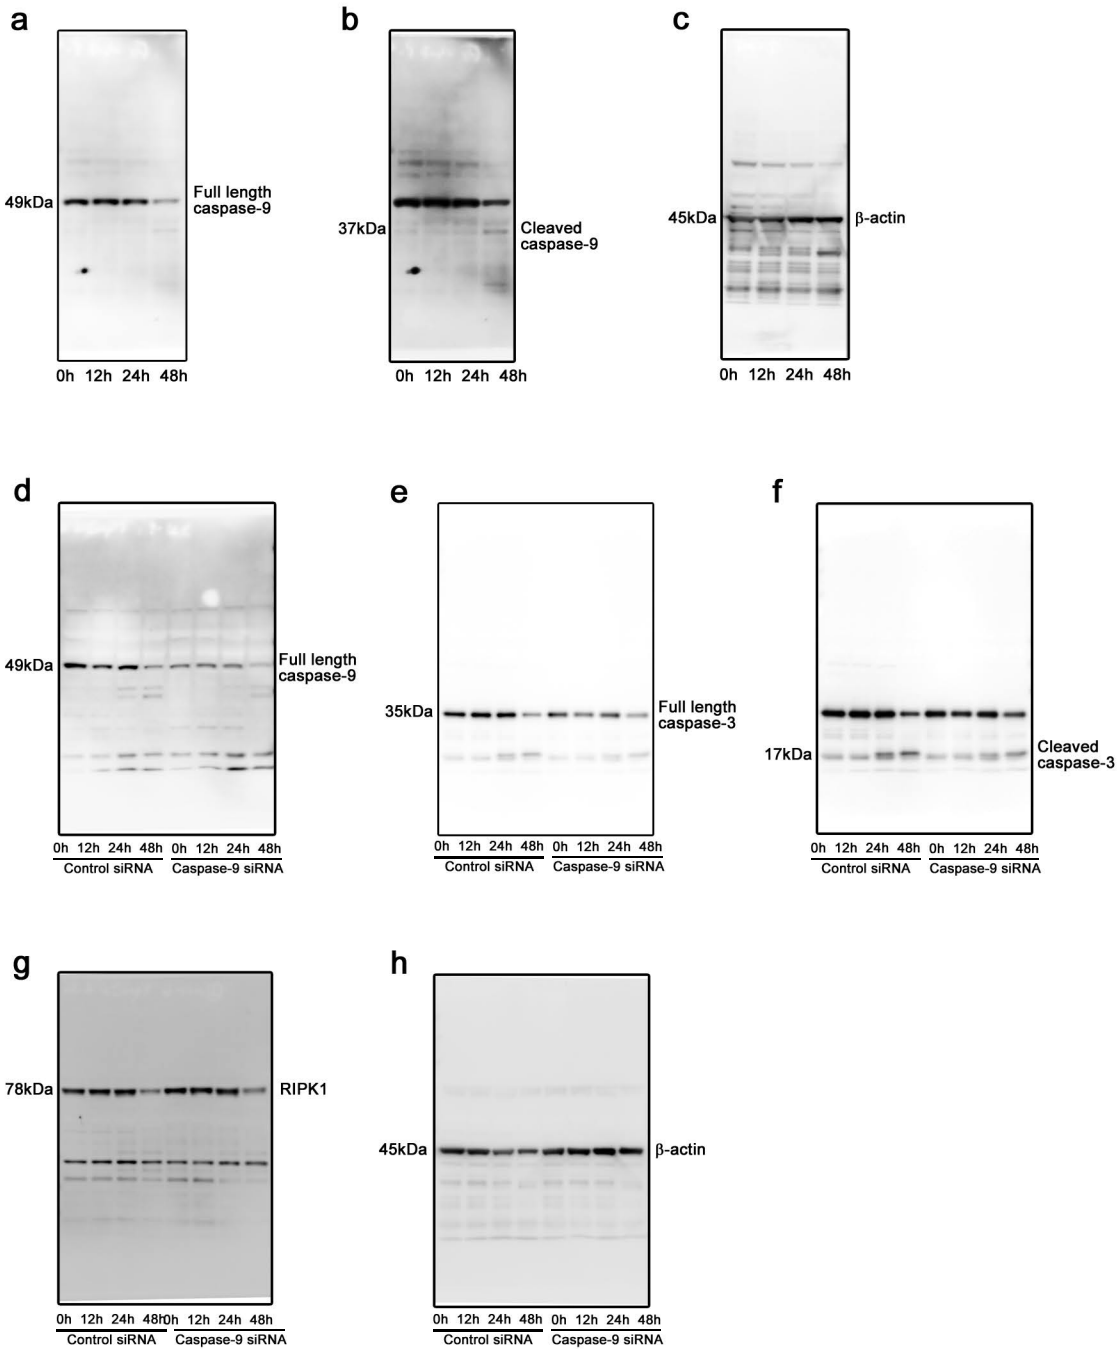

Supplement: ijms-20-05896-s001.pdf [file ijms-20-05896-s001.pdf]
